# Supplementary material
Source: Royal Society of Chemistry journal article supplement (doi:10.1039/d6nj01131d)

## Supplementary Information

The scanning electron microscopy and XRD data of the desulfurizer after the regeneration cycle

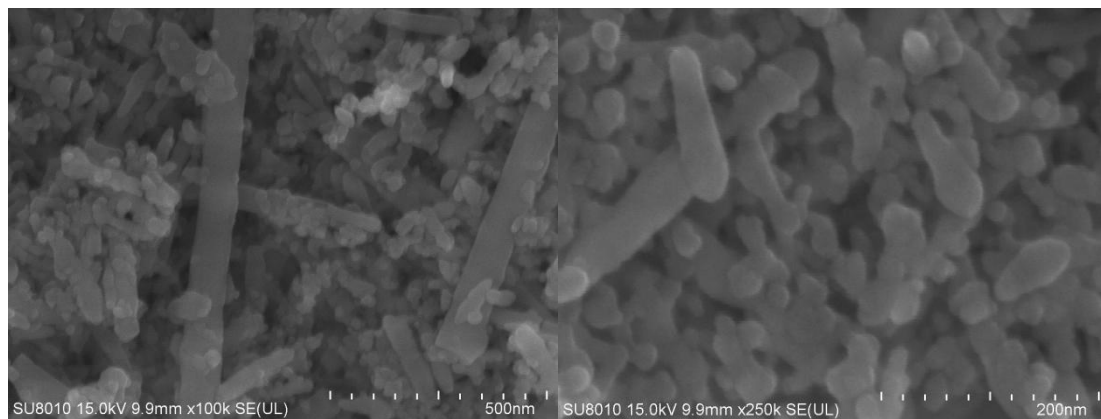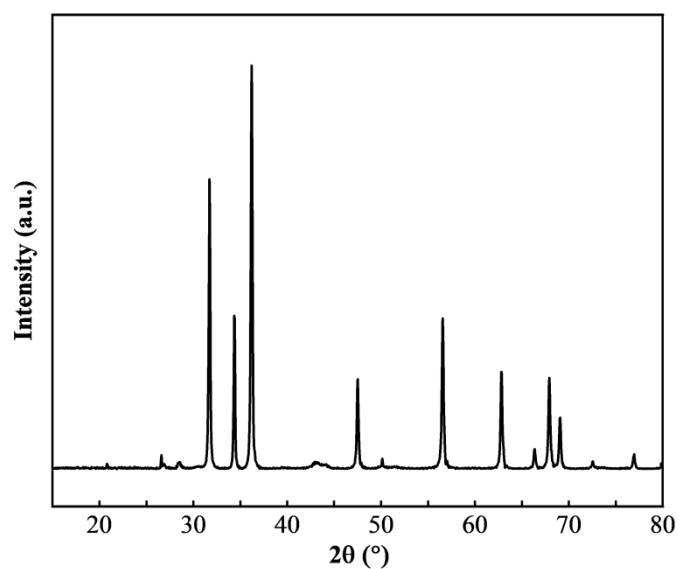

Supplement: d6nj01131d1.pdf [file d6nj01131d1.pdf]
